# Supplementary material for: Single-molecule sequencing resolves the detailed structure of complex satellite DNA loci in Drosophila melanogaster
Source: PubMed Central journal article supplement — Genome Res. 2017 May;27(5):709–21. doi: 10.1101/gr.213512.116 (PMC5411766; doi:10.1101/gr.213512.116), 2017-05
Supplement: supp_gr.213512.116_Supplemental_Figures_Tables_Methods.pdf [file supp_gr.213512.116_Supplemental_Figures_Tables_Methods.pdf]

## **SUPPLEMENTARY FIGURES**

Figure S1. *Rsp*, *BariI* and *AAGAG* clusters on chromosome 2R

Figure S2. Molecular validation of *Rsp* locus

Figure S3: Major *Rsp* locus in Canu 4% assembly

Figure S4. Coverage of deep Illumina reads over *Rsp* locus in the MHAP 20\_1500\_25X assembly

Figure S5: Coverage of deep Illumina reads over *Rsp* contig in Canu 4% assembly

Figure S6. Coverage of deep Illumina reads over *Rsp* locus in PBcR-BLASR assembly

Figure S7. Coverage of raw PacBio reads mapped against PBcR-BLASR assembly

Figure S8: Coverage of raw PacBio reads mapped against BLASR-corr Cel8.3 assembly

Figure S9. Mummer dotplot alignment of *Rsp* loci

Figure S10: Nucleotide substitution error distribution

Figure S11. Indel distribution from Pilon

Figure S12. R6 vs PBcR-BLASR assembly comparison

Figure S13. Map of centromere-proximal *G2* contig

Figure S14. *G5* phylogeny

Figure S15: Structure of *I.688* loci

## **SUPPLEMENTARY TABLES**

Table S1: Summary of PBcR-MHAP assemblies

Table S2: Summary of FALCON assemblies

Table S3: Summary of Canu assemblies

Table S4: *Rsp* and *260-bp* loci breakpoints in R6 vs PbcR-BLASR

Table S5: Simple satellites in reads and assembly

## **SUPPLEMENTARY FILES**

### Supplemental Methods

File S1: Sample Celera 8.3 MHAP specification file, with default small/haploid genome parameters. Parameters altered in this study were merSize, -k, --num-hashes, and assembleCoverage.

File S2: Sample Celera 8.3 MHAP specification file, with large/diploid genome parameters. Parameters altered in this study were merSize, -k, --num-hashes, and assembleCoverage.

File S3: Sample specification file used to run Canu assembler with 4% error rate

File S4: Sample specification file used to run FALCON

File S5: Spec file used to construct BLASR-corr Cel8.3 assembly

File S6: SLURM script used to construct BLASR-corr Cel8.3 assembly. Note: this script did not appear to properly allocate resources on our cluster, resulting in a long (~17 days) assembly time. Configured properly, assembly should be much faster.

File S7: SLURM file used to run Canu 1.2 using BLASR corrected reads (Canu-corr assembly). This uses the default Canu settings but skips read correction.

File S8: SLURM job handler file used to to run Celera 8.3 assembler

File S9: Custom Rebase repeat library used to annotate assemblies.

File S10: Perl script used to annotate assembly from BLAST output

File S11: GFF annotation file for the major Rsp locus in the PBcR-BLASR assembly, constructed using custom scripts.

File S12: GFF annotation file for the 1.688 loci in the PBcR-BLASR assembly, constructed using custom scripts.

File S13: GFF annotation file for the minor Rsp locus in the PBcR-BLASR assembly, constructed using custom scripts.

Figure S1. *Rsp*, *Bari1* and AAGAG clusters on chromosome 2R

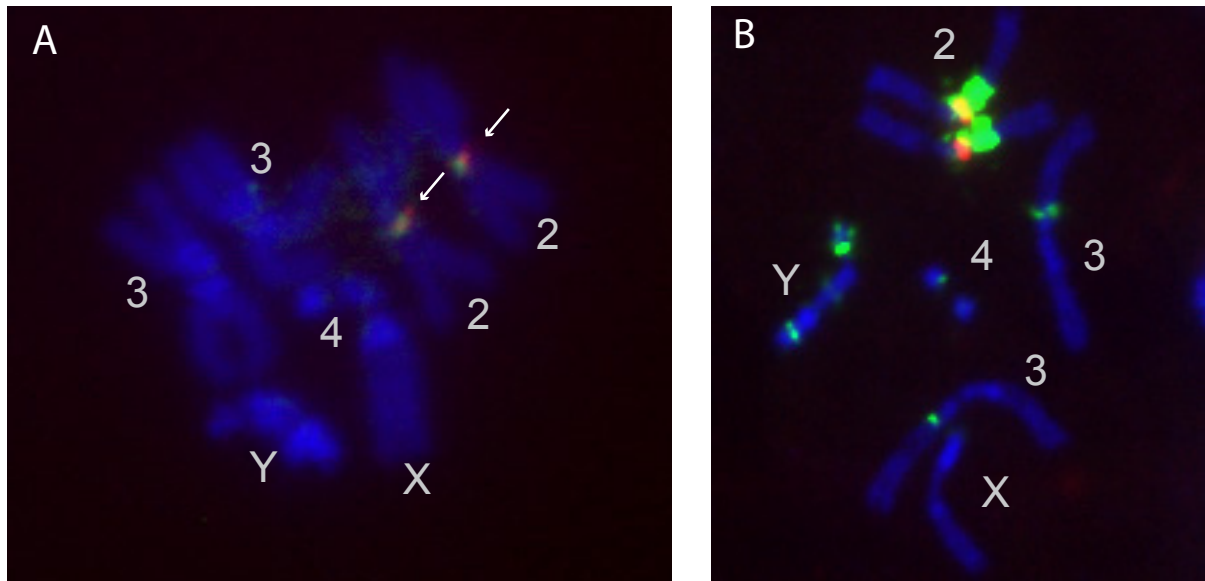

Fig S1. FISH image of *D. melanogaster* mitotic chromosomes from 3rd instar larvae. DNA is stained with DAPI (blue). A. *Rsp* (red) and *Bari1* (green) are close together on chromosome 2R. B. AAGAG (green) is widespread throughout the genome. On chromosome 2, it spans the centromere and is distal to *Rsp* on chromosome 2R.

Figure S2. Molecular validation of *Rsp* locus

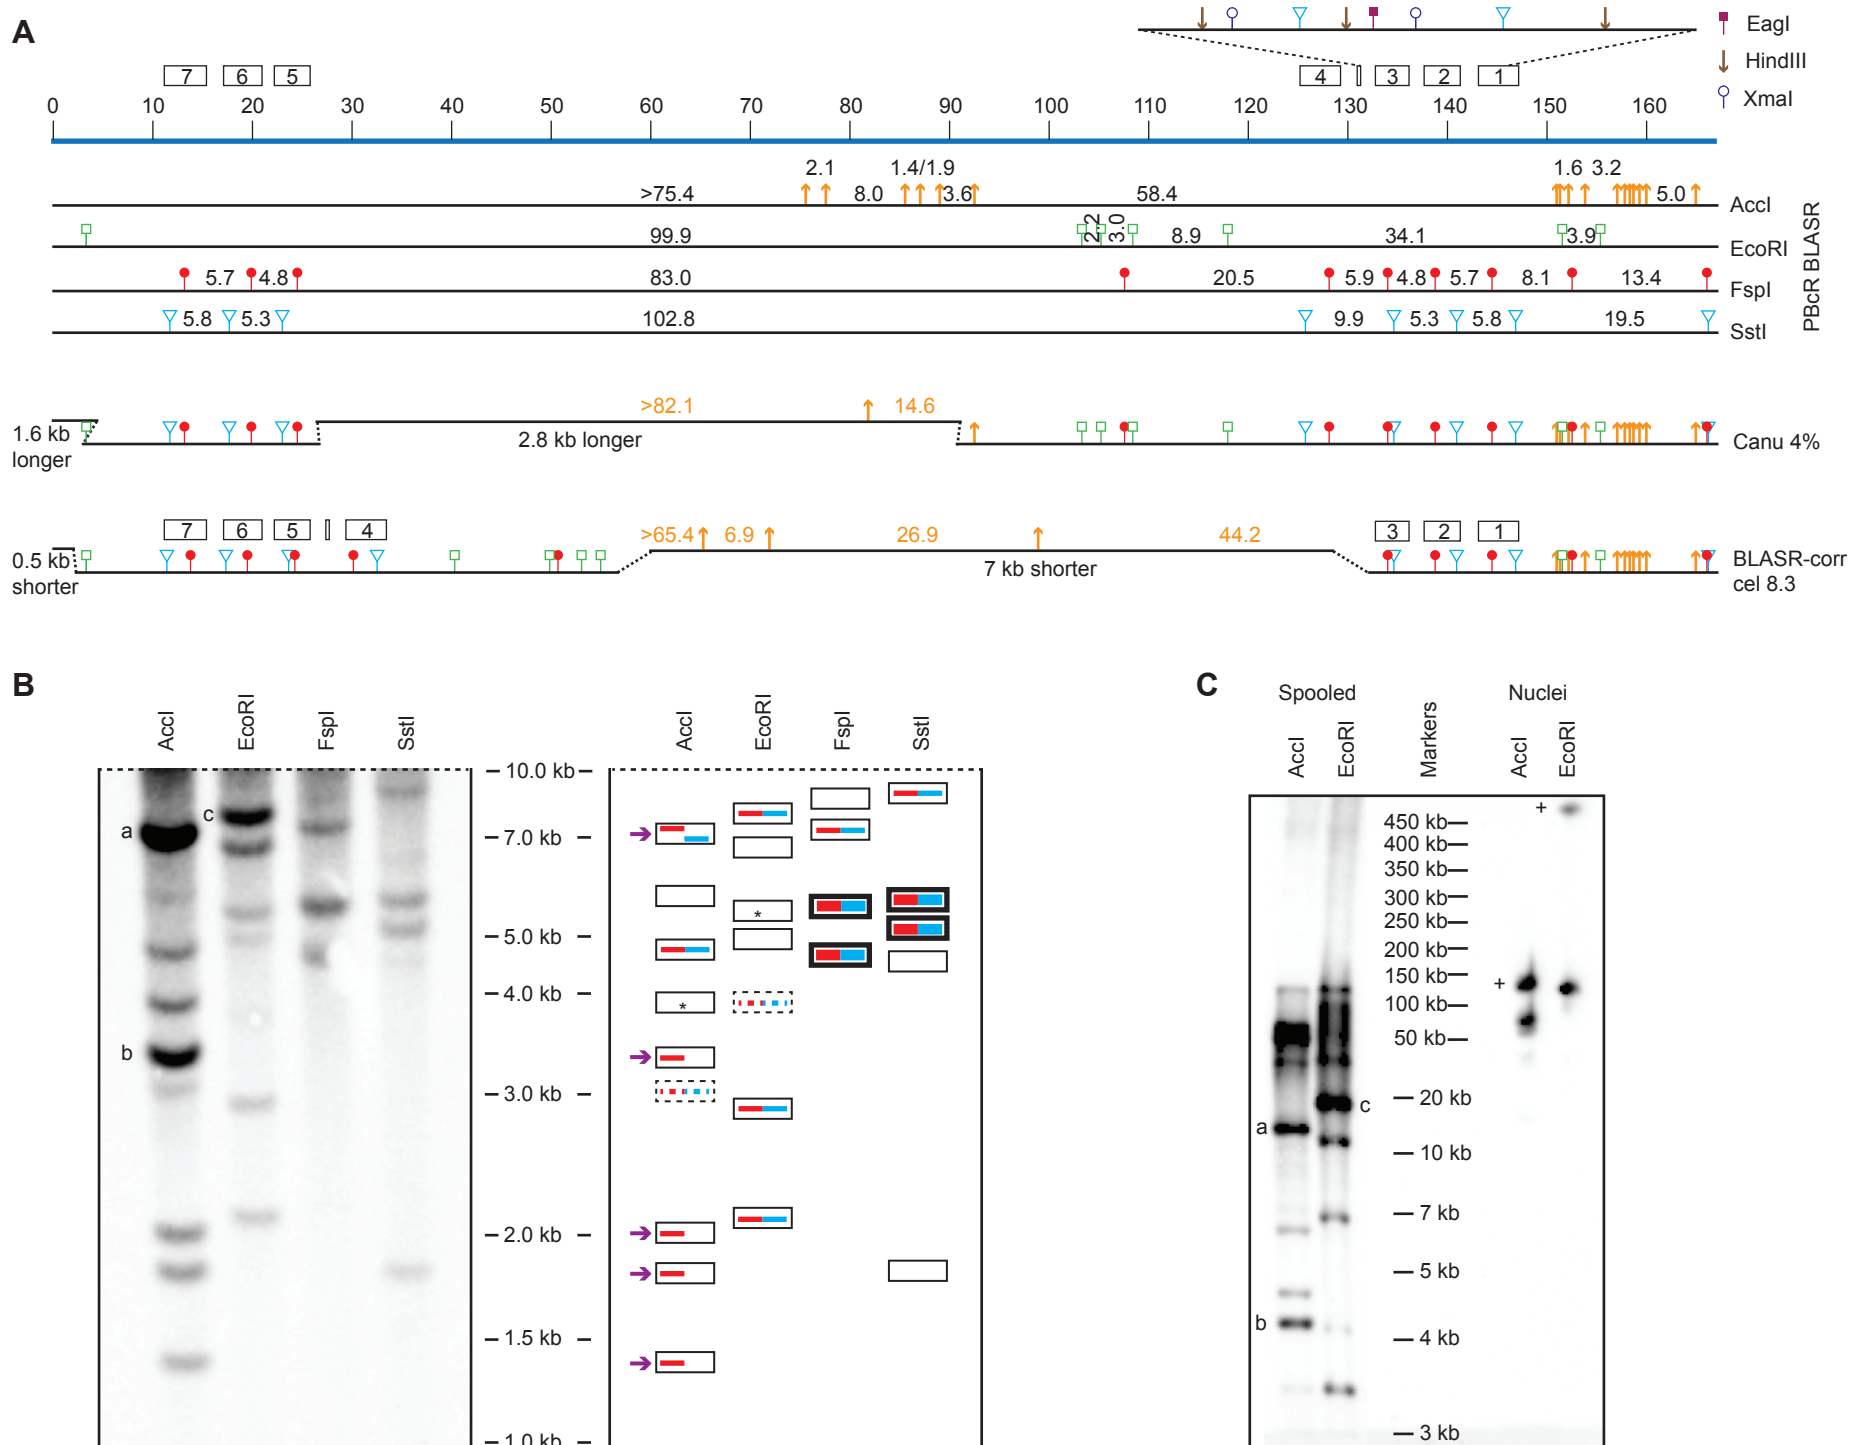

Figure S2: A. Schematic showing the extent of the assembled *Rsp* array (blue line as in Figure 2A) as well as the approximate locations of restriction endonuclease sites (*AccI*, *EcoRI*, *FspI*, *SstI*) within the PBcR-BLASR, Canu 4% and BLASR-corr cel 8.3 assemblies. Predicted fragment sizes based on *in silico* digestion of the *Rsp* locus in the PBcR-BLASR assembly in Geneious are also indicated for each of these enzymes. Because there are additional *Rsp* repeats proximal (left on the diagram, see text) to the assembled array, it is not possible to determine the size of the proximal fragment(s) for any of the restriction enzymes (e.g. a proximal *AccI* fragment is greater than 75 kb). The position of *G5 Jockey* repeats are indicated by the numbered boxes. The location of the 15-kb PCR product and the positions of the restriction enzyme sites used to produce Figure 2A are shown above the blue line. B. Genomic blot and schematic interpretation as described in Figure 2B except the *AccI* bands inconsistent with the Canu 4% assembly are also indicated (arrows). Sizes of the hybridizing bands can be compared to the *in silico* predictions in (A). Select bands are indicated with a letter (a,b,c) and their sizes compared to the same fragments in (C). C. Pulse-field gel of spooled DNA (left) and high molecular weight DNA (nuclei, right) digested with the indicated restriction enzymes and probed with *Rsp*. The intensity of the bands labeled a,b, c (left) anchor the pattern seen in (C), but the *Rsp* fragments appear to run slower under the pulse field conditions. For the lanes on the right, the size of the smaller fragment in each digest can be compared to the *in silico* prediction. + unpredicted band which may represent hybridization to repeats proximal to those in the assembly.

Fig. S3: Major *Rsp* locus in Canu 4% assembly

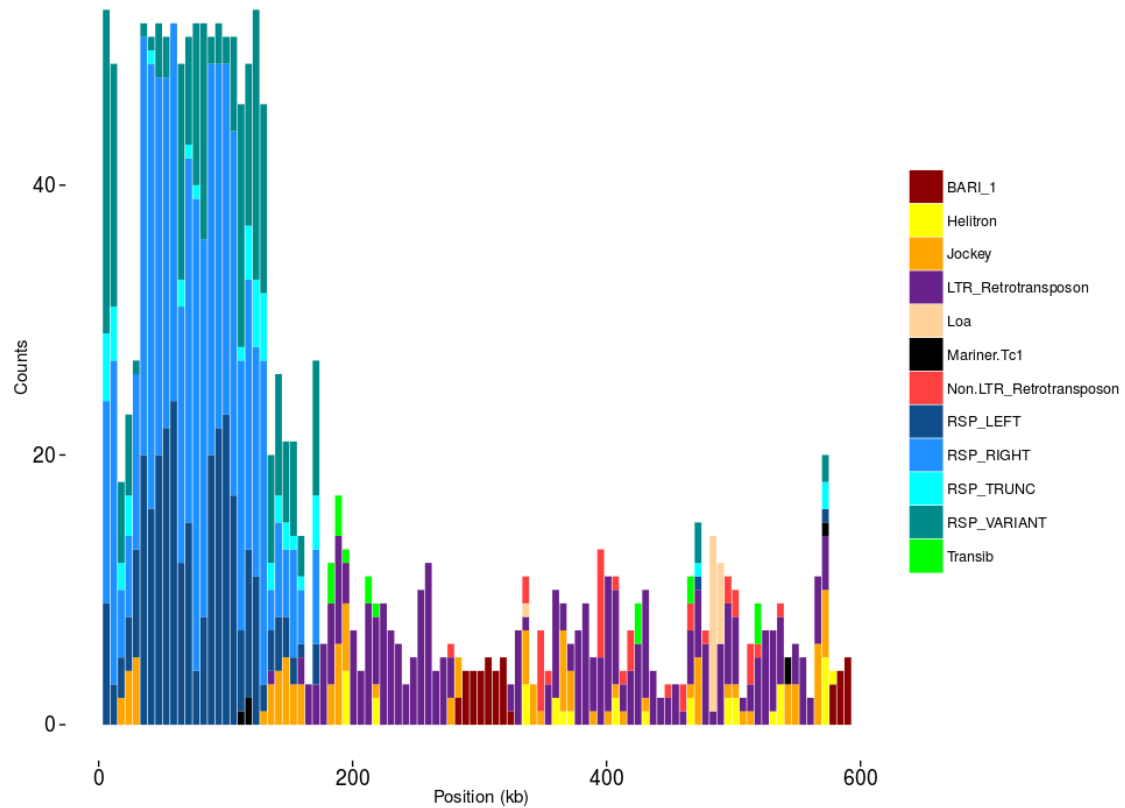

Figure S3: Major *Rsp* locus in Canu 4% assembly. Counts for each element in our custom Rebase library in 5-kb windows across the *Rsp* locus in our Canu 4% assembly. The main block of *Rsp* repeats is approximately equal in repeat number to the PBcR-BLASR assembly, and orientation of the repeats is supported by restriction digest and Southern blot analysis. The contig extends the PBcR-BLASR contig ~300 kb distally, which includes an additional 10 variant *Rsp* repeats (minor *Rsp* locus) as well as the *BariI* clusters. These additional repeats are also present in the PBcR-BLASR assembly, but on a separate contig.

Figure S4. Coverage of deep Illumina reads over *Rsp* locus in the MHAP 20\_1500\_25X assembly

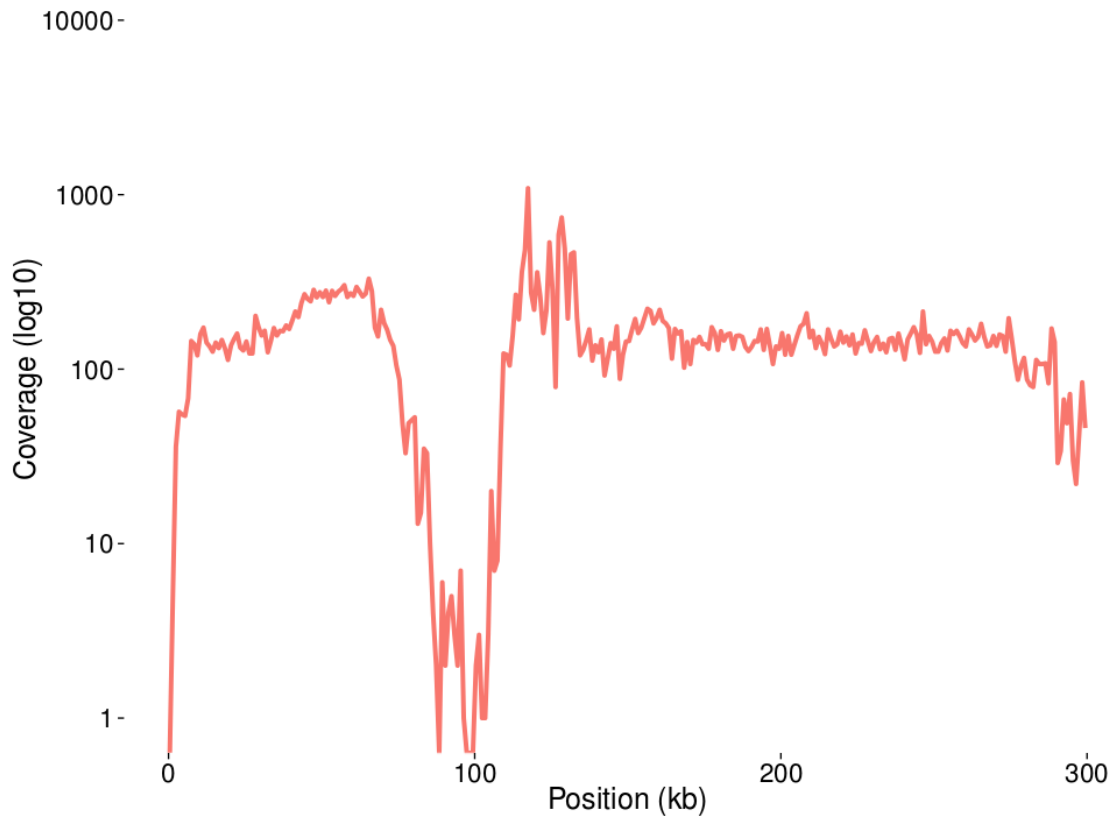

Figure S4: Coverage of deep Illumina reads (SRA accession ERR701706) over *Rsp* locus in MHAP 20\_1500\_25X assembly mapped using the `-very-sensitive` settings in Bowtie2. Coverage was plotted in 1-kb windows using Bedtools and is shown on a log scale.

Fig. S5: Coverage of deep Illumina reads over *Rsp* contig in Canu 4% assembly

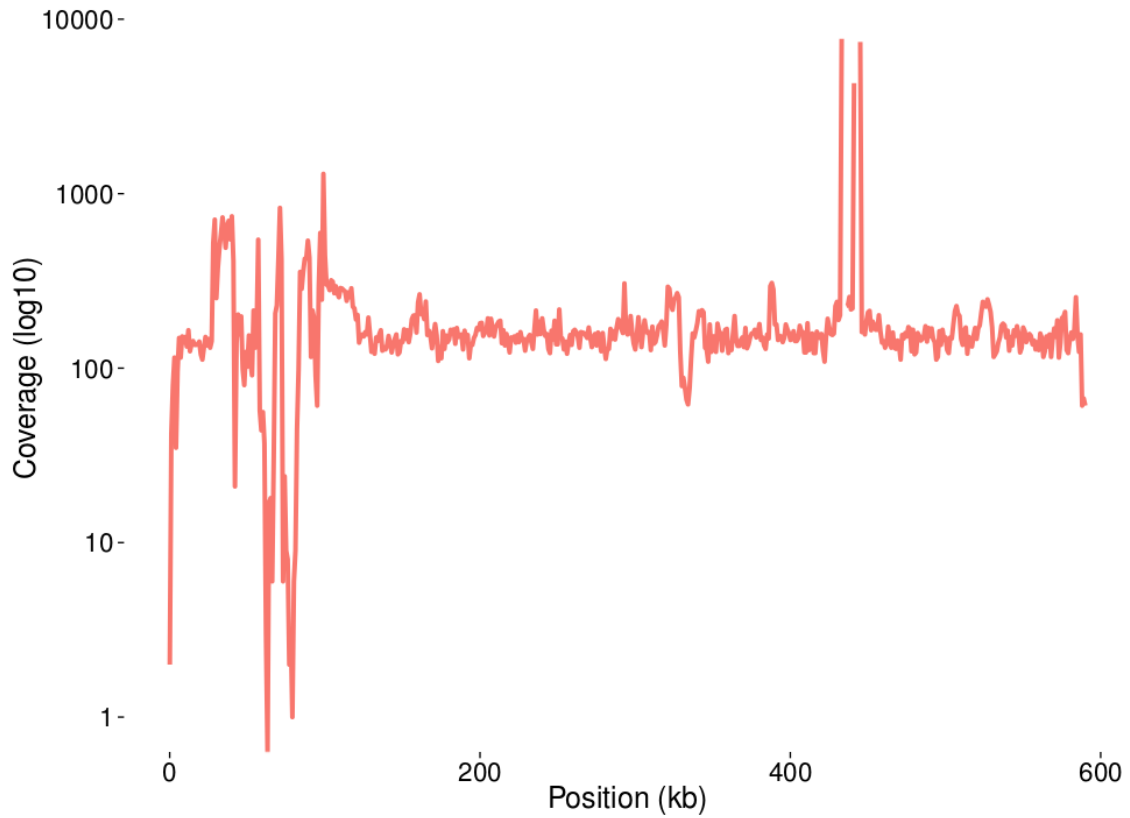

Figure S5: Coverage of deep Illumina reads (SRA accession ERR701706) over *Rsp* locus in Canu 4% error-rate assembly mapped using `-very-sensitive` settings in Bowtie2. Coverage was plotted in 1-kb windows using Bedtools and is shown on a log scale.

Figure S6. Coverage of deep Illumina reads over *Rsp* locus in PBcR-BLASR assembly

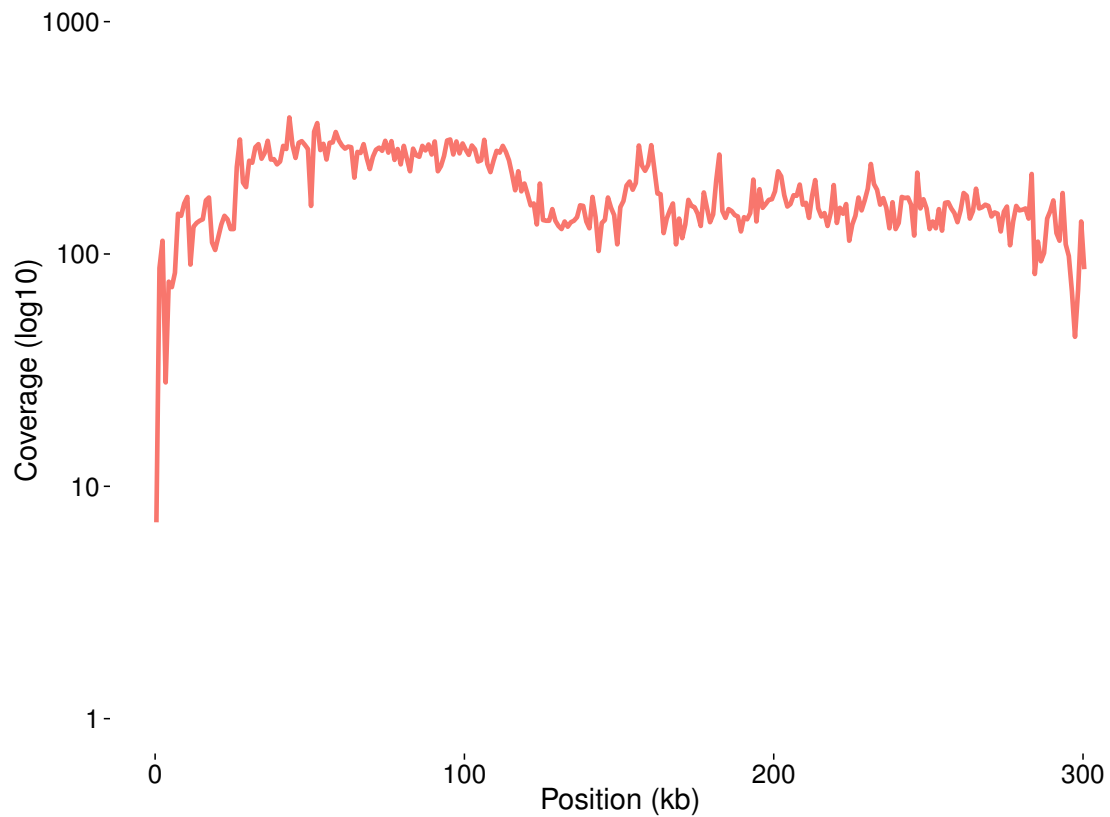

Figure S6: Coverage of deep Illumina reads (SRA accession ERR701706) over *Rsp* locus in PBcR-BLASR assembly mapped using the `-very-sensitive` settings in Bowtie2. Coverage was plotted in 1-kb windows using Bedtools and is shown on a log scale.



Figure S7. Coverage of raw PacBio reads mapped against PBcR-BLASR assembly

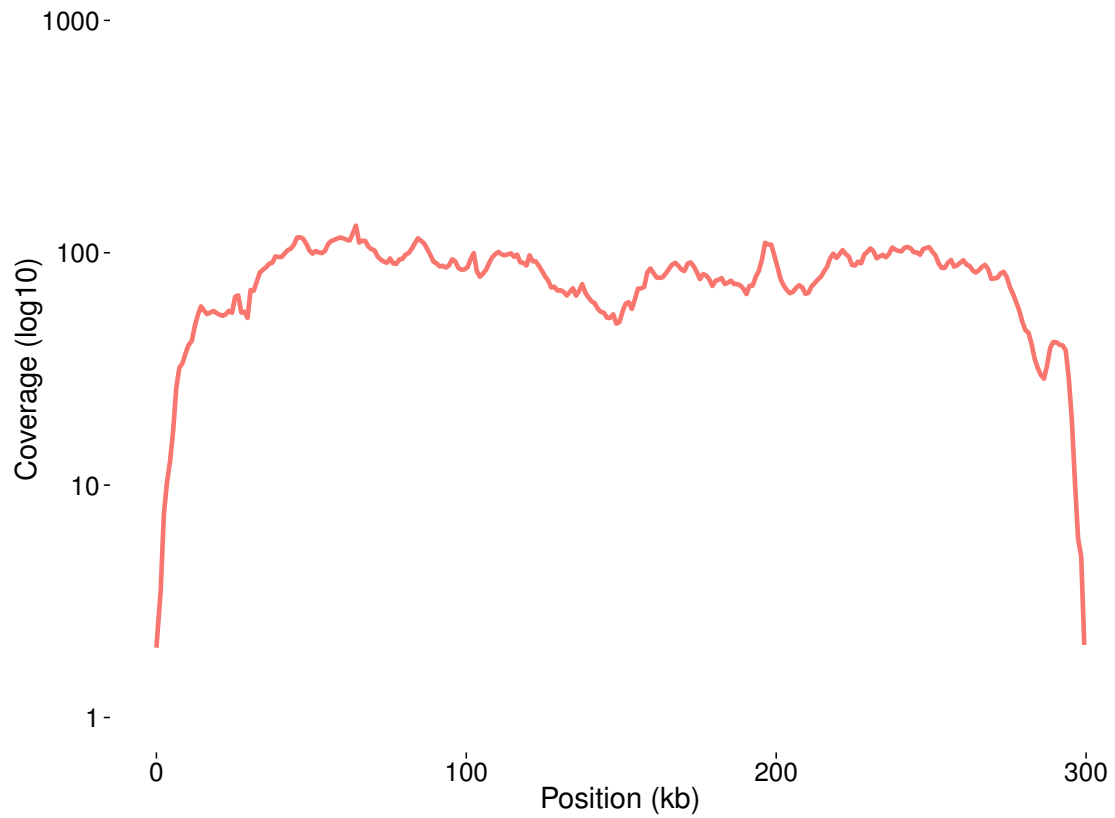

Figure S7: Coverage of raw PacBio reads mapped against PBcR-BLASR assembly. Reads were mapped using BLASR included in SMRT Analysis v. 2.3. Coverage shown on a  $\log(10)$  scale.

Figure S8: Coverage of raw PacBio reads mapped against BLASR-corr Cel8.3 assembly

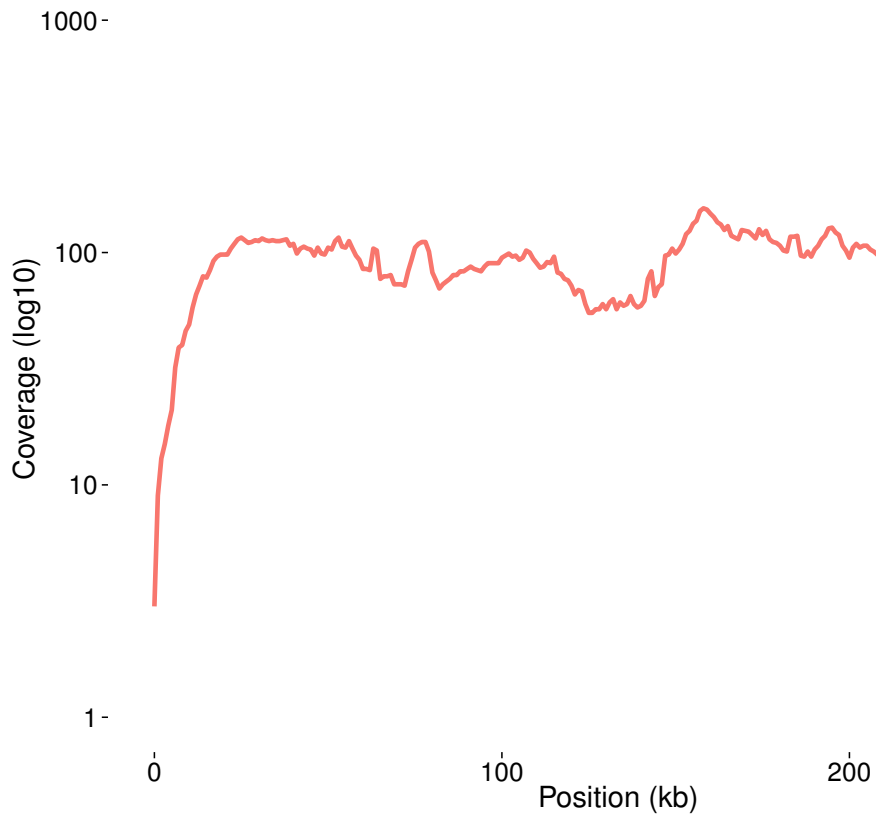

Figure S8: Coverage of raw PacBio reads mapped against BLASR-corr Cel8.3 assembly. Reads were mapped using BLASR included in SMRT Analysis v. 2.3. Coverage shown on a log(10) scale.

Figure S9. Mummer dotplot alignment of *Rsp* loci

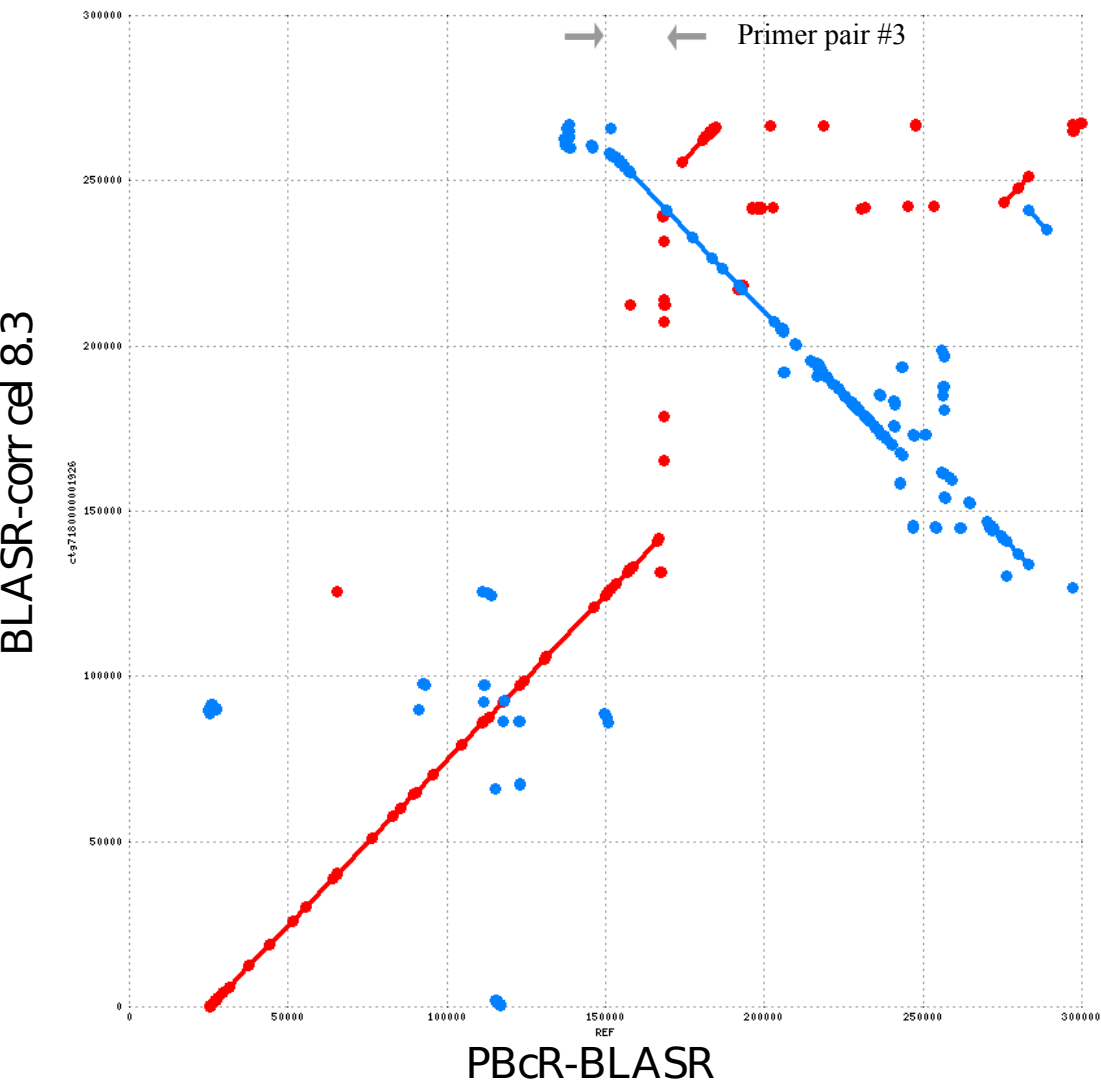

Figure S9: Mummer dotplot alignment of *Rsp* loci contigs from the two best-supported assemblies (PBcR-BLASR and BLASR-corr Cel8.3). Red points indicate identical strand, blue indicates opposite strand. Approximate locations of long PCR primers used to verify the PBcR-BLASR orientation are indicated with grey arrows.

Fig. S10: Nucleotide substitution error distribution

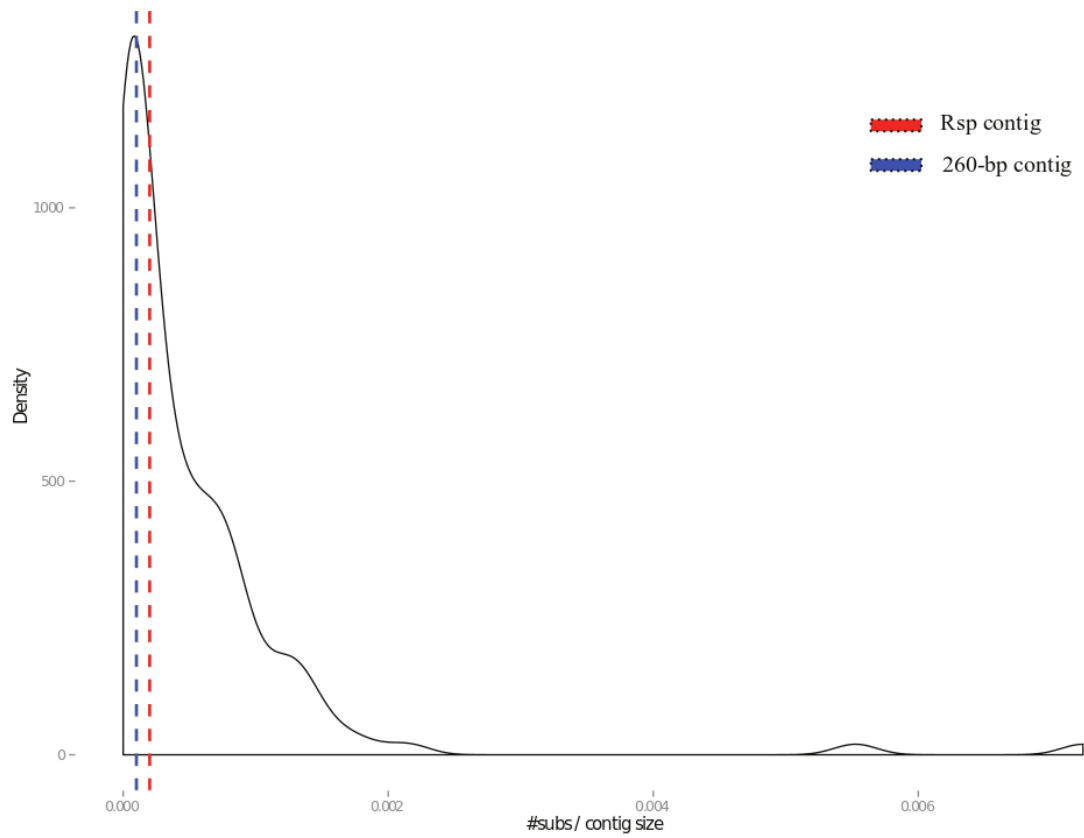

Figure S10: Density plot showing distribution of nucleotide substitutions fraction for each contig in the PBcR-BLASR assembly. Illumina reads were mapped to the assembly using Bowtie2, and Pilon was used to generate variant call format (vcf) files. SNPs for each contig were summed and divided by the total contig length.

Fig S11. Indel distribution

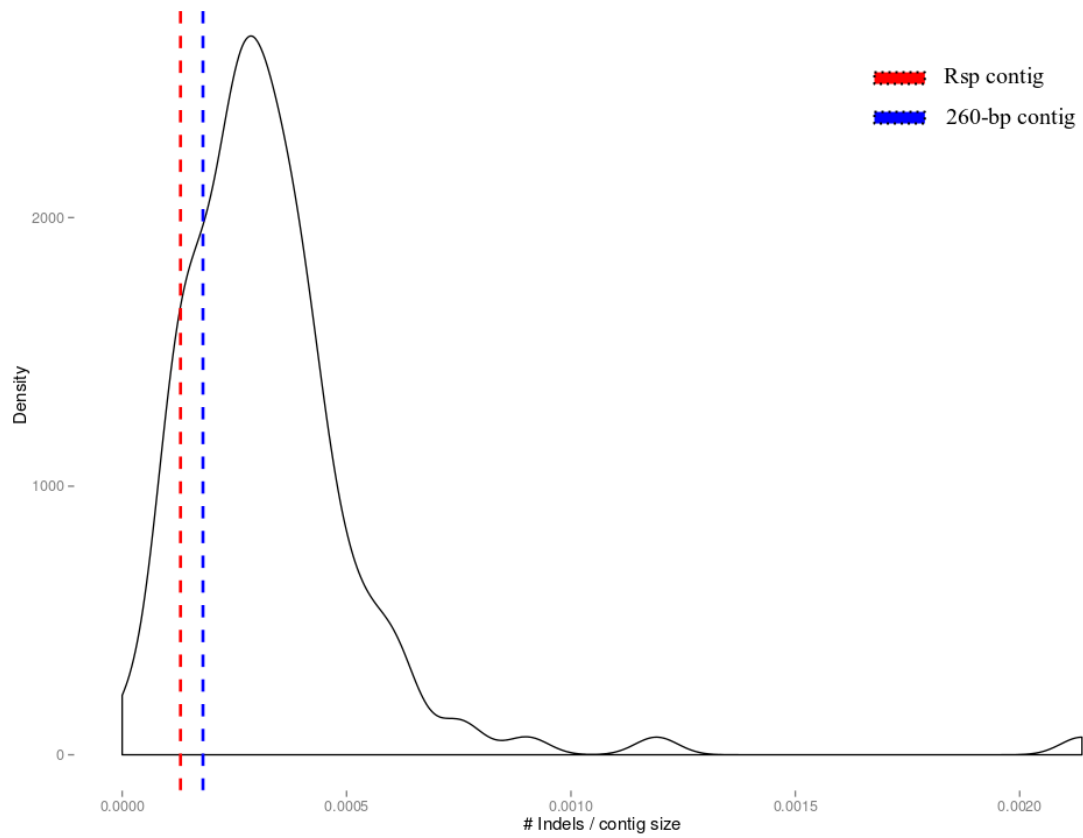

Figure S11: Density plot showing distribution of indel fraction for each contig in the PBcR-BLASR assembly. Illumina reads were mapped to the assembly using Bowtie2, and Pilon was used to generate variant call format (vcf) files. Indels for each contig were summed and divided by the total contig length.

# Figure S12: R6 vs PBcR-BLASR assembly comparison

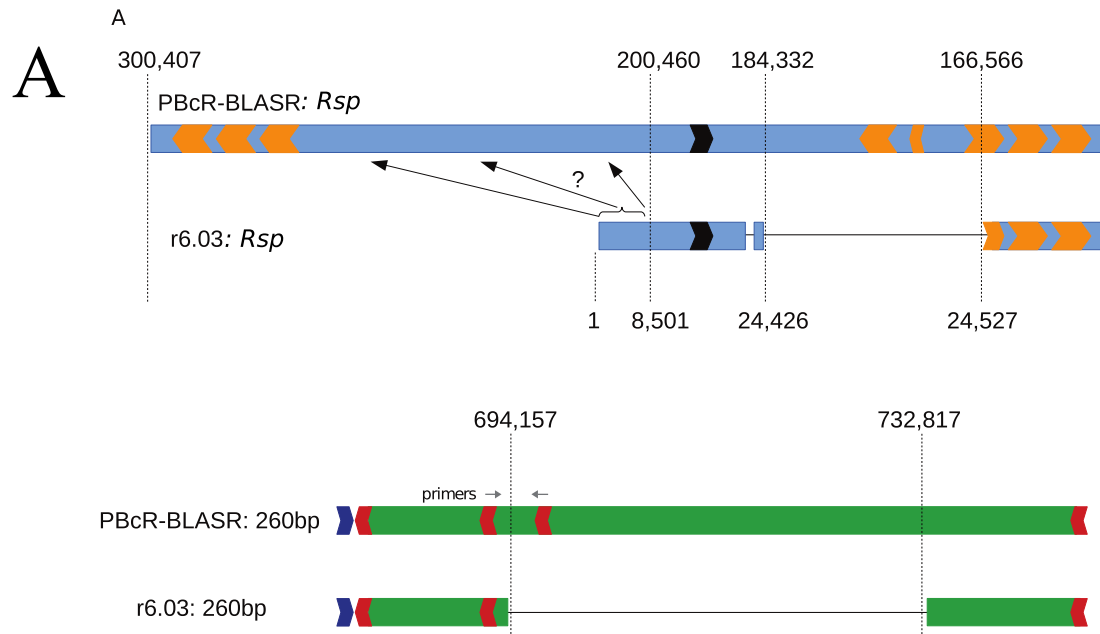

**B**

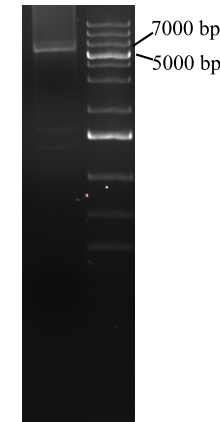

**C**

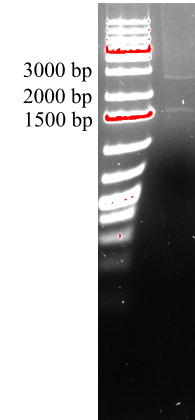

**D**

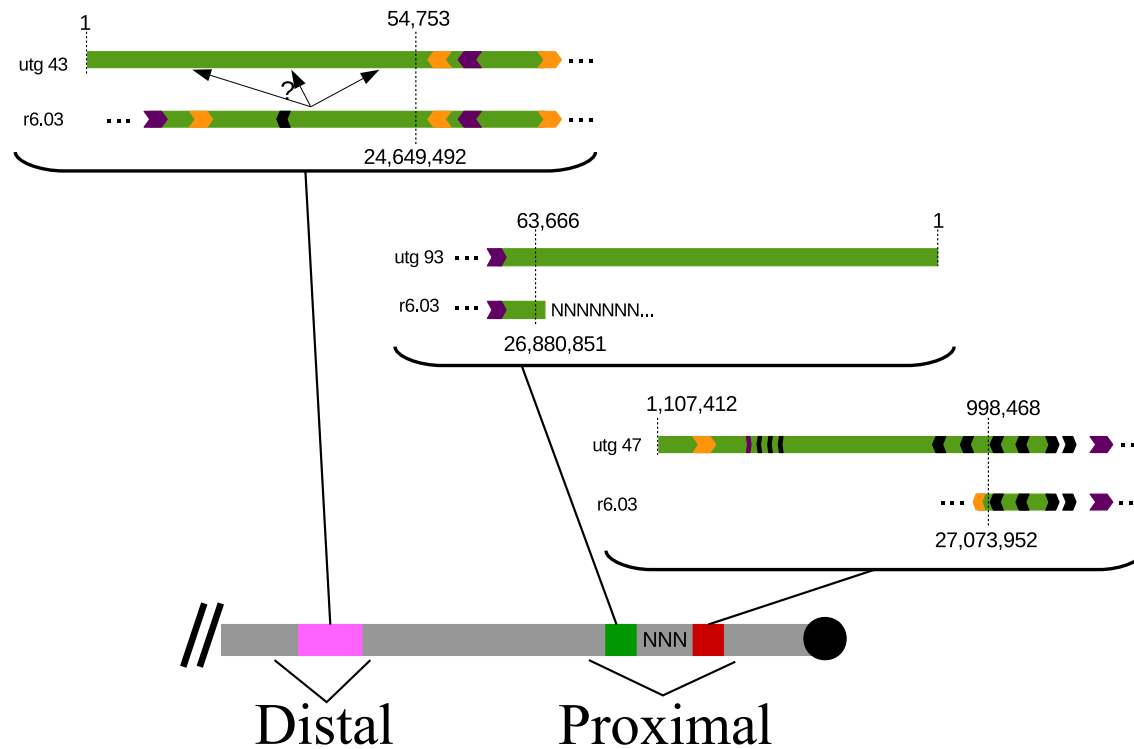

Figure S12: Comparison and verification of *Rsp* and *1.688* satellite loci. (A) Schematic representing hand-curated alignment of the *Rsp* and *260-bp* loci in Release 6 reference genome (R6) against our PBcR-BLASR assembly. Breakpoints between the alignments are indicated with dotted lines, along with their coordinates in each assembly. For *260-bp*, approximate positions of primers used to verify the locus in PBcR-BLASR are shown with arrows. (B) Agarose gel showing results of long PCR verifying *260-bp* locus. Expected size of product is ~5.4 kb. (C) Restriction digest of purified PCR product from (B). Expected sizes: 2.6 kb, 1.5 kb, 646 bp, 517 bp and 260 bp. (D) Alignment of contigs from other *1.688* loci in PBcR-BLASR against R6, with breakpoints indicated by dotted lines. A schematic of the 3L pericentromeric region shows the relative position of the distal and proximal *1.688* loci.

Figure S13. Map of centromere-proximal *G2* contig

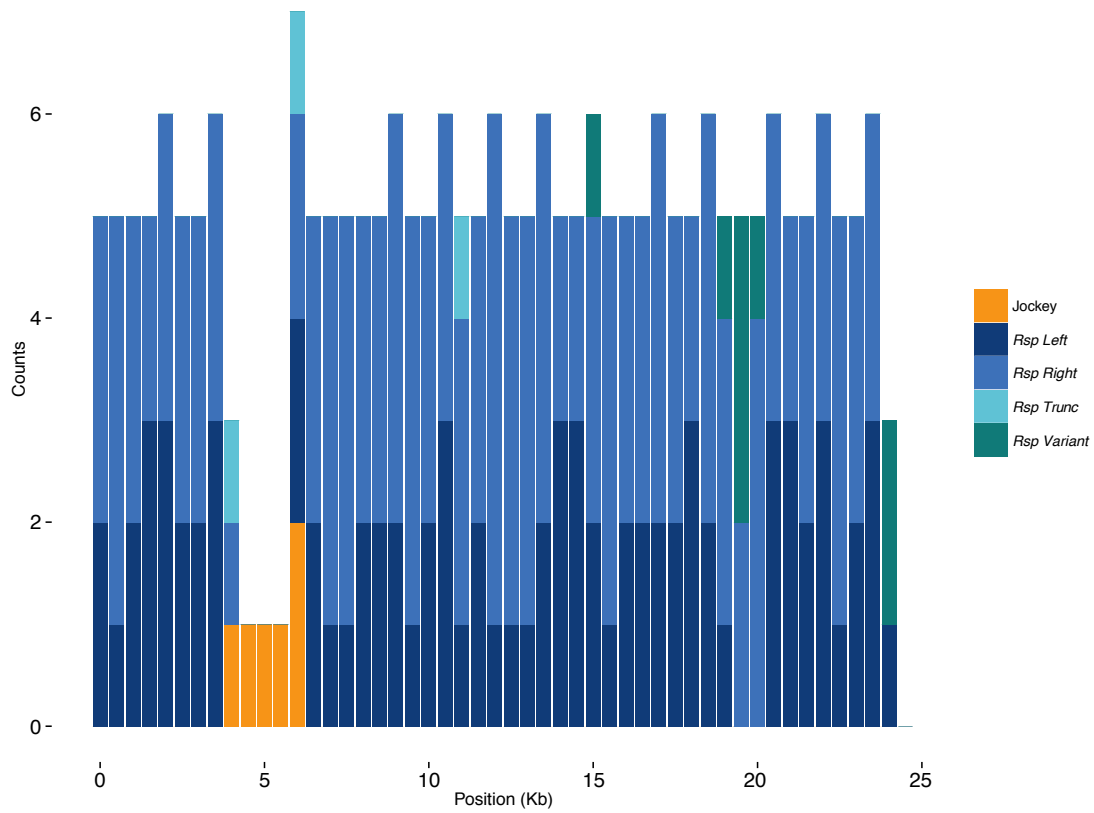

Figure S13: Map of the centromere-proximal *G2-Rsp* contig assembled using corrected PacBio reads. Counts for each repetitive elements in our custom Rebase library are plotted in 500 bp windows across the contig.

Fig S14: *G5* phylogeny

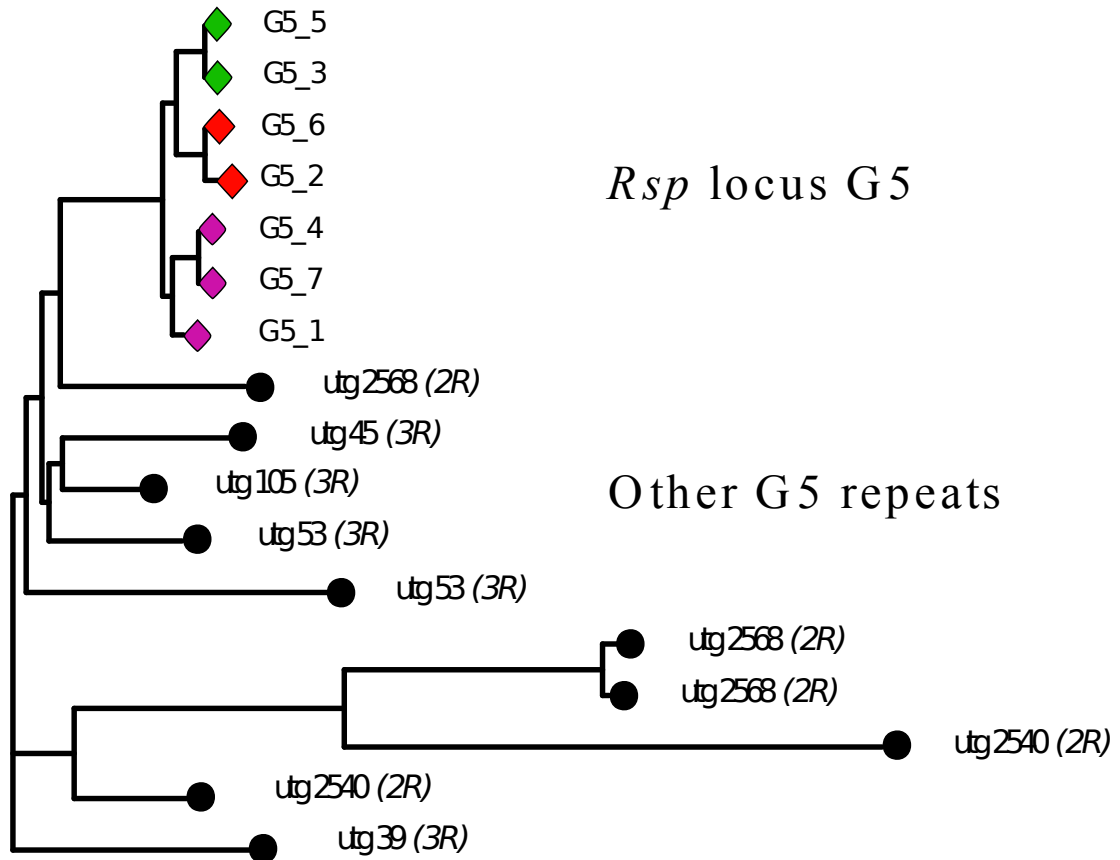

Figure S14: RaxML tree of *G5* repeats at *Rsp* locus and all other *G5* repeats > 1000bp in the PBcR-BLASR assembly. Tree was built in Geneious with 100 bootstraps. The other *G5* repeats on 2R are all at least 2 Mb distal to the *Rsp* locus *G5* cluster.



Figure S15: structure of *1.688* loci

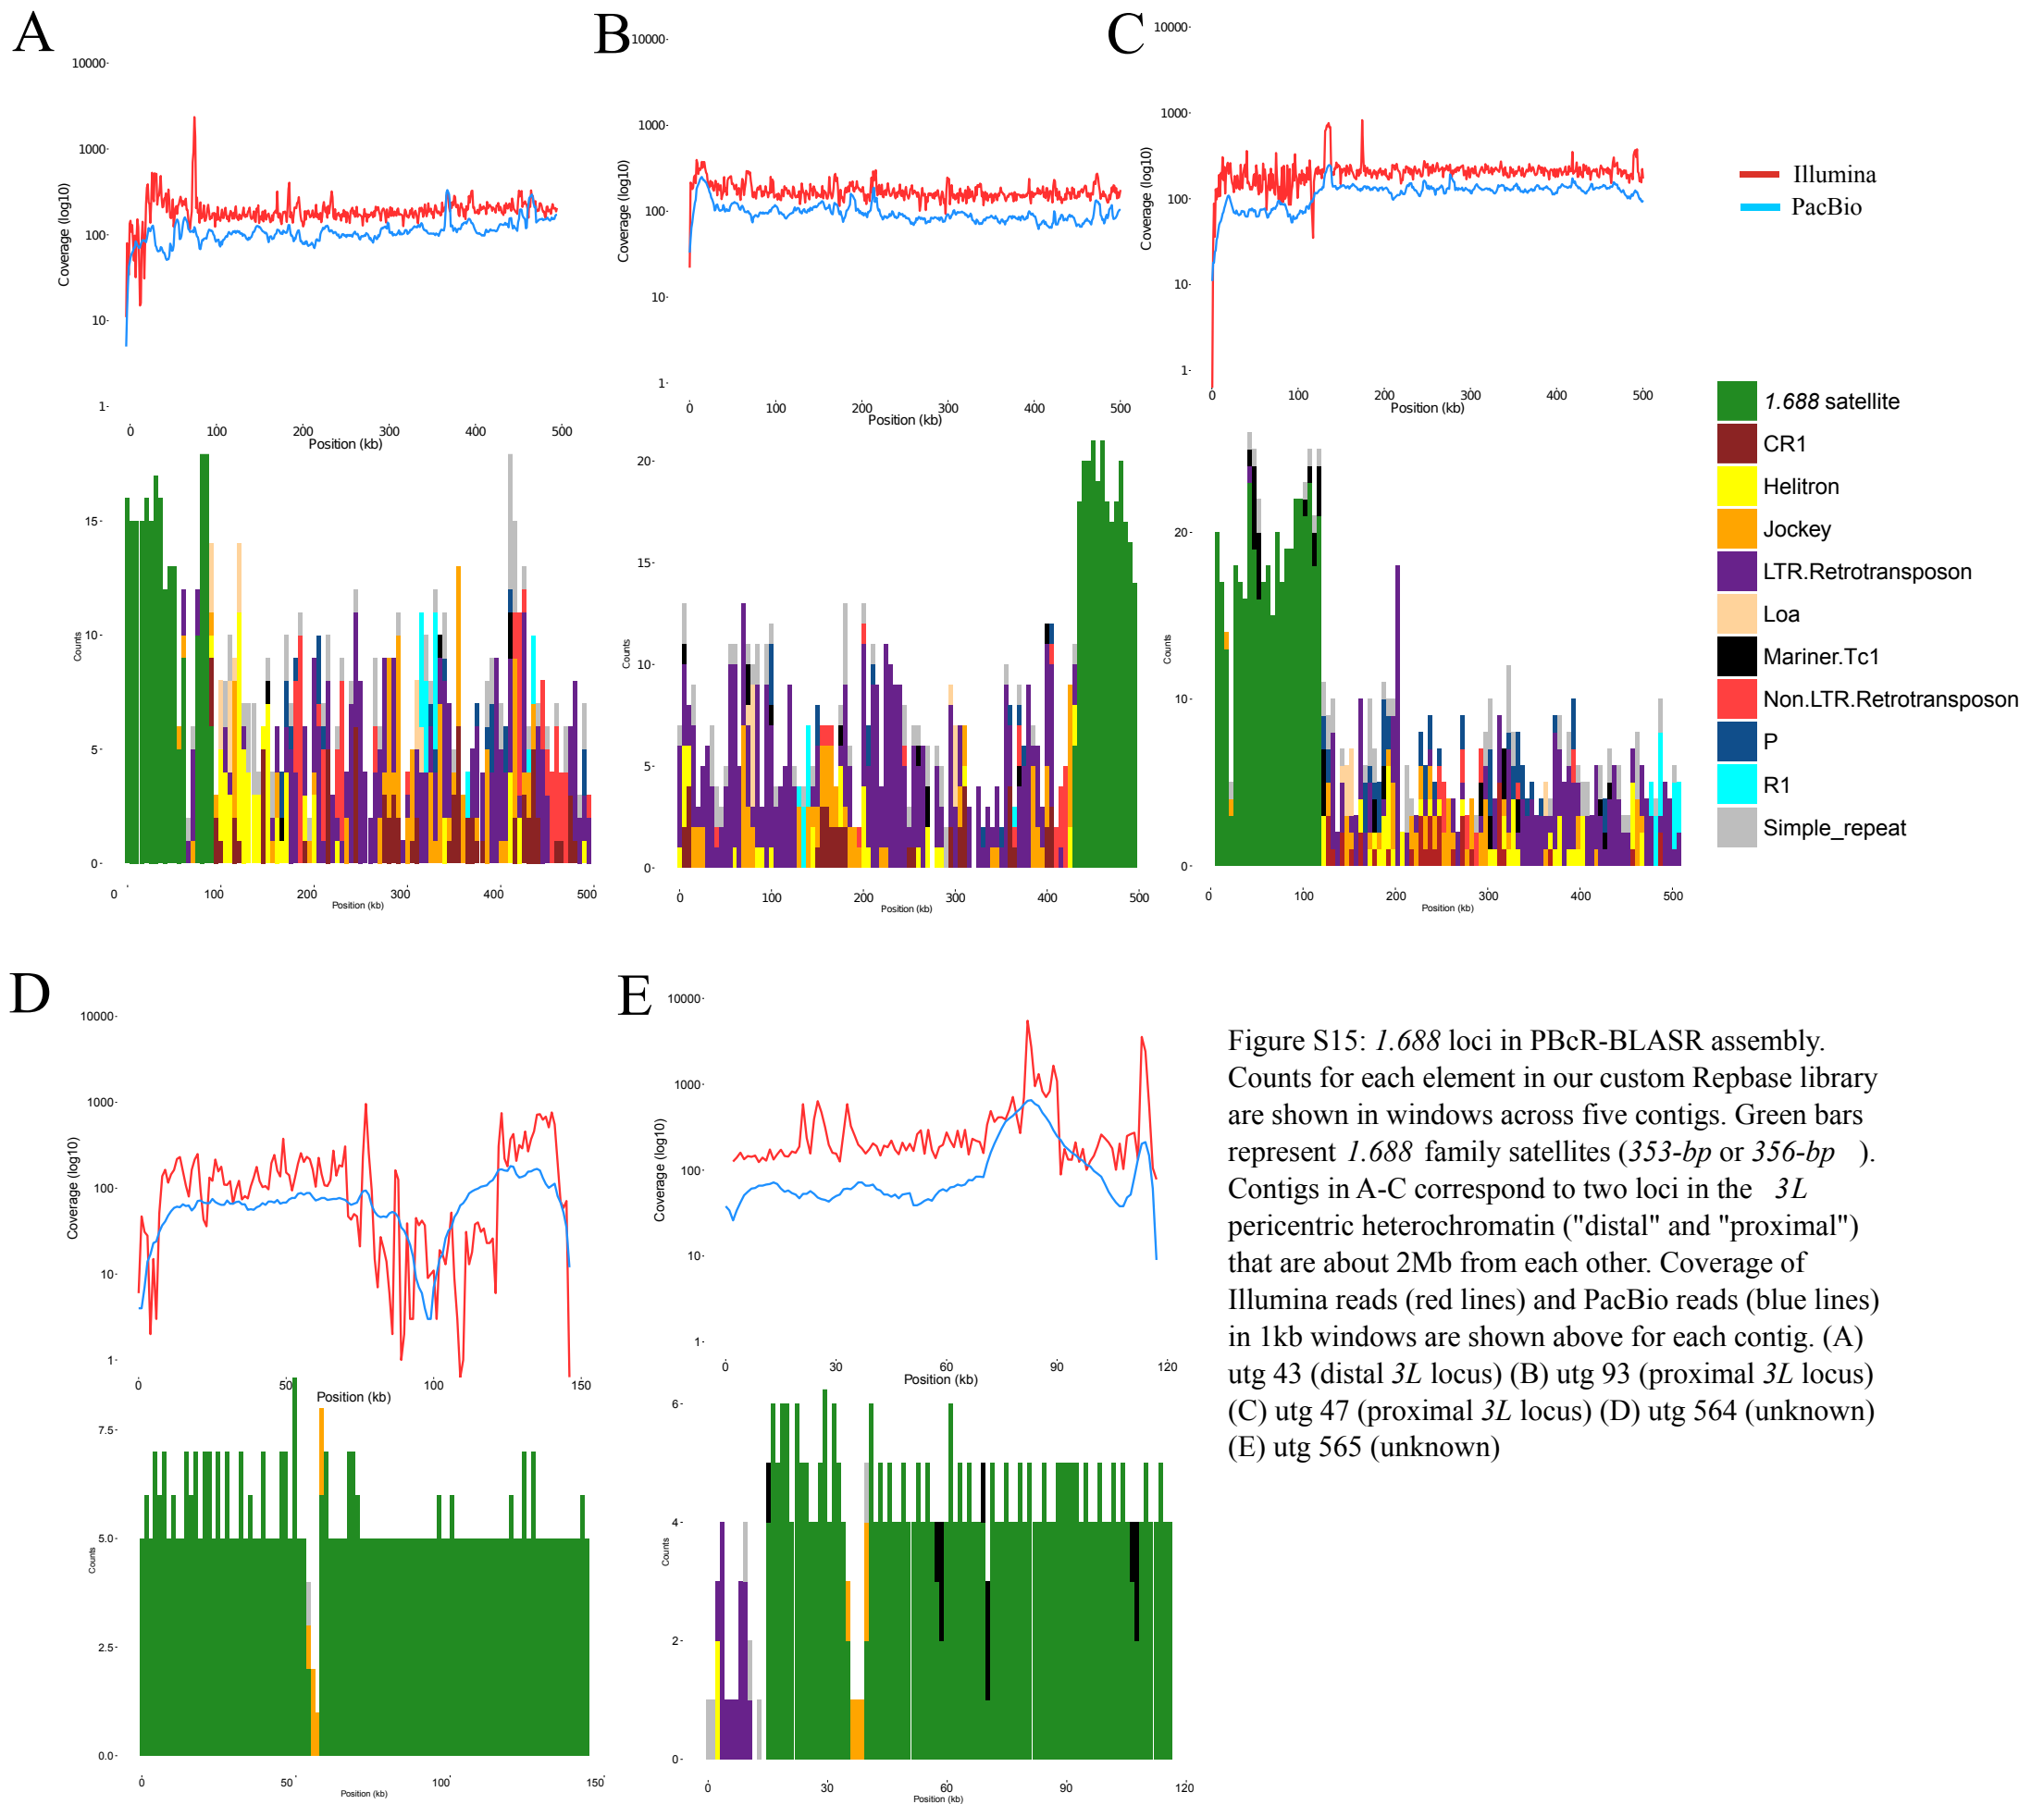

Figure S15: *1.688* loci in PBcR-BLASR assembly. Counts for each element in our custom Repbase library are shown in windows across five contigs. Green bars represent *1.688* family satellites (*353-bp* or *356-bp*). Contigs in A-C correspond to two loci in the *3L* pericentric heterochromatin ("distal" and "proximal") that are about 2Mb from each other. Coverage of Illumina reads (red lines) and PacBio reads (blue lines) in 1kb windows are shown above for each contig. (A) utg 43 (distal *3L* locus) (B) utg 93 (proximal *3L* locus) (C) utg 47 (proximal *3L* locus) (D) utg 564 (unknown) (E) utg 565 (unknown)

Table\_S1

Table S1: summary of PBcR-MHAP assemblies

|                       | Diploid/large genome? | kmer | sketch size | coverage | # Rsp | # Rsp conti | Rsp score* | # 260-bp | # 260-bp cc | 260 score** |
|-----------------------|-----------------------|------|-------------|----------|-------|-------------|------------|----------|-------------|-------------|
| r6.03                 | n/a                   | n/a  | n/a         | n/a      | 343   | 9           | 38.1       | 206      | 57          | 3.6         |
| PBcR BLASR*           | n/a                   | 14   | n/a         | 25       | 1088  | 3           | 362.7      | 284      | 13          | 21.8        |
| blasr corr cel8.3     | n/a                   | 14   | 1500        | 25       | 923   | 3           | 307.7      | 505      | 46          | 11.0        |
| PBcR-MHAP 8.2**       | n                     | 16   | 1024        | 25       | 251   | 4           | 62.8       | 172      | 16          | 10.8        |
| PBcR-MHAP 8.2 EK      | n                     | 16   | 1024        | 25       | 256   | 5           | 51.2       | 163      | 13          | 12.5        |
| PBcR-MHAP 8.3 EK      | n                     | 16   | 1024        | 25       | 616   | 8           | 77.0       | 283      | 39          | 7.3         |
| PBcR-MHAP 20_500_25X  | y                     | 20   | 500         | 25       | 1964  | 6           | 327.3      | 384      | 60          | 6.4         |
| PBcR-MHAP 20_2000_25X | y                     | 20   | 2000        | 25       | 1512  | 5           | 302.4      | 439      | 42          | 10.5        |
| PBcR-MHAP 25_1500_25X | y                     | 25   | 1500        | 25       | 2318  | 9           | 257.6      | 385      | 61          | 6.3         |
| PBcR-MHAP 25_2000_25X | y                     | 25   | 2000        | 25       | 2441  | 10          | 244.1      | 398      | 46          | 8.7         |
| PBcR-MHAP 14_20X      | y                     | 14   | 1500        | 20       | 1291  | 5           | 258.2      | 341      | 41          | 8.3         |
| PBcR-MHAP 14_25X      | y                     | 14   | 1500        | 25       | 2362  | 11          | 214.7      | 391      | 45          | 8.7         |
| PBcR-MHAP 16_20X      | y                     | 16   | 1500        | 20       | 1260  | 4           | 315.0      | 374      | 37          | 10.1        |
| PBcR-MHAP 18_25X      | y                     | 18   | 1500        | 25       | 1858  | 6           | 309.7      | 513      | 48          | 10.7        |
| PBcR-MHAP 20_25X      | y                     | 20   | 1500        | 25       | 1486  | 5           | 297.2      | 391      | 41          | 9.5         |
| PBcR-MHAP 20_20X      | y                     | 20   | 1500        | 20       | 1986  | 8           | 248.3      | 445      | 39          | 11.4        |

\*Sergey Koren and Adam Phillipy

\*\*Berlin et al 2015

\*\*\*Score refers to # repeats / # of contigs

Table S2: summary of FALCON assemblies

|                 | -min_cov | -min_size | # Rsp | # Rsp contigs | Rsp score* | # 260-bp | # 260-bp contigs | 260 score* |
|-----------------|----------|-----------|-------|---------------|------------|----------|------------------|------------|
| falcon_20_2500  | 20       | 2500      | 438   | 5             | 87.6       | 289      | 11               | 26.2727273 |
| falcon_20_5000  | 20       | 5000      | 295   | 4             | 73.75      | 282      | 10               | 28.2       |
| falcon_20_7500  | 20       | 7500      | 391   | 4             | 97.75      | 289      | 12               | 24.0833333 |
| falcon_5_10000  | 5        | 10000     | 370   | 4             | 92.5       | 283      | 12               | 23.5833333 |
| falcon_5_2500   | 5        | 2500      | 423   | 6             | 70.5       | 343      | 20               | 17.15      |
| falcon_5_5000   | 5        | 5000      | 622   | 7             | 88.8571429 | 320      | 16               | 20         |
| falcon_5_7500   | 5        | 7500      | 546   | 6             | 91         | 290      | 17               | 17.0588235 |
| falcon_10_10000 | 10       | 10000     | 365   | 4             | 91.25      | 342      | 18               | 19         |
| falcon_10_2500  | 10       | 2500      | 385   | 6             | 64.1666667 | 326      | 18               | 18.1111111 |
| falcon_10_5000  | 10       | 5000      | 565   | 5             | 113        | 317      | 17               | 18.6470588 |
| falcon_10_7500  | 10       | 7500      | 544   | 5             | 108.8      | 293      | 15               | 19.5333333 |
| falcon_15_10000 | 15       | 10000     | 386   | 4             | 96.5       | 296      | 17               | 17.4117647 |
| falcon_15_2500  | 15       | 2500      | 438   | 5             | 87.6       | 292      | 12               | 24.3333333 |
| falcon_15_5000  | 15       | 5000      | 602   | 5             | 120.4      | 282      | 11               | 25.6363636 |
| falcon_15_7500  | 15       | 7500      | 290   | 4             | 72.5       | 297      | 12               | 24.75      |
| falcon_20_10000 | 20       | 10000     | 391   | 4             | 97.75      | 136      | 14               | 9.71428571 |
| falcon_min12000 |          | 12000     | 665   | 6             | 110.833333 | 372      | 20               | 18.6       |
| falcon_min5000  |          | 5000      | 1169  | 11            | 106.272727 | 403      | 33               | 12.2121212 |
| falcon_ek       |          |           | 703   | 6             | 117.166667 | 455      | 32               | 14.21875   |

\*Score refers to # repeats / # of contigs

Table S3: summary of Canu assemblies

|                      | <i>Error rate</i> | <i># Rsp</i> | <i># Rsp contigs</i> | <i>Rsp score*</i> | <i># 260</i> | <i># 260 contigs</i> | <i>260 score*</i> |
|----------------------|-------------------|--------------|----------------------|-------------------|--------------|----------------------|-------------------|
| canu 0.02            | 0.02              | 689          | 4                    | 172.25            | 121          | 18                   | 6.7222222         |
| canu default (0.025) | 0.025             | 954          | 6                    | 159               | 255          | 18                   | 14.166667         |
| canu 0.035           | 0.035             | 1295         | 4                    | 323.75            | 277          | 14                   | 19.785714         |
| canu 0.04            | 0.04              | 1114         | 3                    | 371.33333         | 265          | 15                   | 17.666667         |
| canu-corr            | N/A               | 1065         | 3                    | 355               | 466          | 29                   | 16.068966         |

\*Score refers to # repeats / # of contigs

## Table S4

Table S4: Rsp and 260-bp loci breakpoints in R6 vs PbcR-BLASR

Assembly: contig

PbcR-BLASR: utg\_2021 300407-166566

R6.03: 2R 24527-end

PbcR-BLASR: utg\_2031 694157-732817

R6.03: 2L 1-23,112,003 23,112,004-end

Table S5

Table S5: simple satellites in reads and assembly

| Sample                | AAGAG count (# bases) | AATAT count (# bases) | Total # bases | Percent AAGAG total | Percent AATAT tot: |
|-----------------------|-----------------------|-----------------------|---------------|---------------------|--------------------|
| Raw reads             | 108057261             | 39477773              | 15744118797   | 0.686334131         | 0.250746158        |
| Error corrected reads | 2761071               | 954412                | 8884162838    | 0.031078573         | 0.010742847        |
| PBcR-BLASR            | 7620                  | 68819                 | 138490501     | 0.005502182         | 0.049692217        |

## Supplemental methods

### *Slot Blots*

Genomic DNA (100 ng to 600 ng) was denatured (final concentration 0.25 N NaOH, 0.5 M NaCl) for 10 mins at room temperature and then quick cooled. Slot blots were performed as recommended using a 48-well BioDot SF microfiltration apparatus (BioRad). Each blot was first hybridized with a biotinylated rp49 RNA probe (generated as per above with primers: T7\_rp49REV 5'-GTAATACGACTCACTATAGGGCAGTAAACGCGGTTCTGCATG-3' and rp49FOR 5'-CAGCATAACAGGCCCAAGATC-3'). The membrane was then stripped with a 100°C solution of 0.1X SSC/ 0.5% SDS (3 times for ~20 mins) and re-hybridized with the *Rsp* probe as per the above Southern analysis. Signals were quantitated using the ImageLab software (BioRad).
